# Supplementary material
Source: PubMed Central journal article supplement (PMC5561274)
Supplement: AEM.01258-17_zam999118012s1.pdf [file AEM.01258-17_zam999118012s1.pdf]

1 *Supporting information for :*

2 **A *Bacillus paralicheniformis* iron-containing urease reduces**  
3 **urea concentrations in rice wine**

4

5 Qingtao Liu<sup>1,2</sup>, Yuqi Chen<sup>1,2</sup>, Minglai Yuan<sup>1,2</sup>, Guocheng Du<sup>1,2\*</sup>, Jian Chen<sup>1,2</sup>, Zhen

6 Kang<sup>1,2\*</sup>

7 <sup>1</sup>The Key Laboratory of Industrial Biotechnology, Ministry of Education, School of

8 Biotechnology, Jiangnan University, Wuxi 214122, China, <sup>2</sup>Synergetic Innovation Center

9 of Food Safety and Nutrition, Jiangnan University, Wuxi, Jiangsu 214122, China

10 Jiangnan University, Wuxi 214122, China.

11 \*corresponding authors: The Key Laboratory of Industrial Biotechnology, Ministry of

12 Education, School of Biotechnology, Jiangnan University, Wuxi 214122, China. Tel:

13 (86)-510-85918307; Fax: (86)-510-85918309; Email: [zkang@jiangnan.edu.cn](mailto:zkang@jiangnan.edu.cn) or

14 [gcd@jiangnan.edu.cn](mailto:gcd@jiangnan.edu.cn)

15

16

17

18

19

20

21

22 **PCR reaction condition**

23 PCR reaction system was composed of 25  $\mu\text{L}$  of 2 $\times$  PrimerSTAR HS Premix  
24 (TAKARA, JAPAN), 1.0  $\mu\text{L}$  of the forward primer (10  $\mu\text{M}$ ), 1.0  $\mu\text{L}$  of the reverse primer  
25 (10  $\mu\text{M}$ ), 1.0  $\mu\text{L}$  of the circulated DNA (1  $\mu\text{g}/\text{mL}$ ) or 1.0  $\mu\text{L}$  of the genomic DNA (100  
26  $\mu\text{g}/\text{mL}$ ), and 22  $\mu\text{L}$  of double-distilled water. PCR conditions were as follows: 98  $^{\circ}\text{C}$  for  
27 30 s; 98  $^{\circ}\text{C}$  for 10 s, 55  $^{\circ}\text{C}$  for 5 s, 72  $^{\circ}\text{C}$  for 1 kb/min; 30 cycles, final extension at 72  $^{\circ}\text{C}$   
28 for 10 min.

29 **Gibson assembly**

30 For single gene assemble with plasmid: the Gibson assembly reaction system was  
31 composed of 4  $\mu\text{L}$  of 5 $\times$  CE II buffer, Exnase<sup>®</sup> 2  $\mu\text{L}$  (Vazyme, NanJing, China), linearized  
32 vector 0.03 pmol, gene fragment 0.06 pmol, double-distilled water up to 20  $\mu\text{L}$ . Then 37  
33  $^{\circ}\text{C}$  for 30 min and put it on the ice for transformation.

34 **Phosphorylation and ligation**

35 The fragment were phosphorylated and ligated by Blunting Kination Ligation (BKL)  
36 Kit (TAKARA, JAPAN). The phosphorylation reaction system were composed of 0.5  $\mu\text{L}$   
37 of 10 $\times$  Blunting Kination Buffer, 0.25 $\mu\text{L}$  of Blunting Kination Enzyme Mix, 4.25  $\mu\text{L}$  of  
38 PCR fragment, then 37  $^{\circ}\text{C}$  for 30 min and 70  $^{\circ}\text{C}$  for 5 min to inactivation of the enzyme.  
39 After cooling down the mixture to 4  $^{\circ}\text{C}$ , 5 $\mu\text{L}$  of Ligation Solution I were added and mixed,

40 and ligated at 16 °C for 1 h, then the mixture were used for transformation.

41

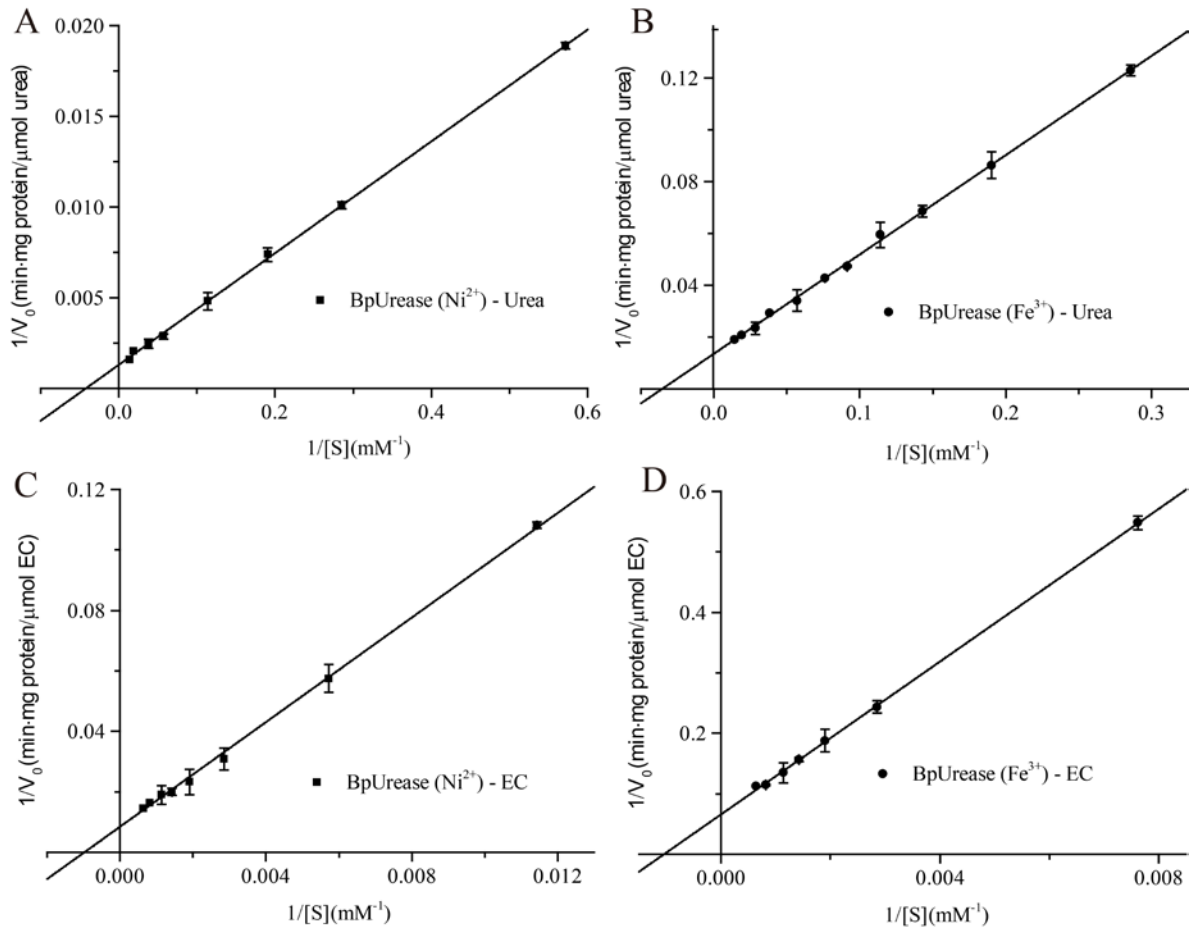

42

43 Figure S1. Lineweaver-Burk plot for  $K_m$  and  $V_{max}$  values of the recombinant urease. (A),

44 (B): Urea as the substrate, with a concentration of 2-80 mM. (C), (D): EC as the substrate,

45 with a concentration of 100-1800 mM.  $V_0$  was defined as  $\mu$ mol urea (or EC) hydrolyzed

46 per mg protein per minute at 37°C and pH 4.5.

47
